# Supplementary material for: Value of the Lung Immune Prognostic Index in Patients with Non-Small Cell Lung Cancer Initiating First-Line Atezolizumab Combination Therapy: Subgroup Analysis of the IMPOWER150 Trial
Source: MDPI journal article supplement (doi:10.3390/cancers13051176), 2021-03-09
Supplement: s1 [file s1]

# Supplementary Material: Value of the Lung Immune Prognostic Index in Patients with Non-Small Cell Lung Cancer Initiating First-Line Atezolizumab Combination Therapy: Subgroup Analysis of the IMPOWER150 Trial

Ashley M. Hopkins, Ganessan Kichenadasse, Ahmad Y. Abuhelwa, Ross A. McKinnon, Andrew Rowland and Michael J. Sorich

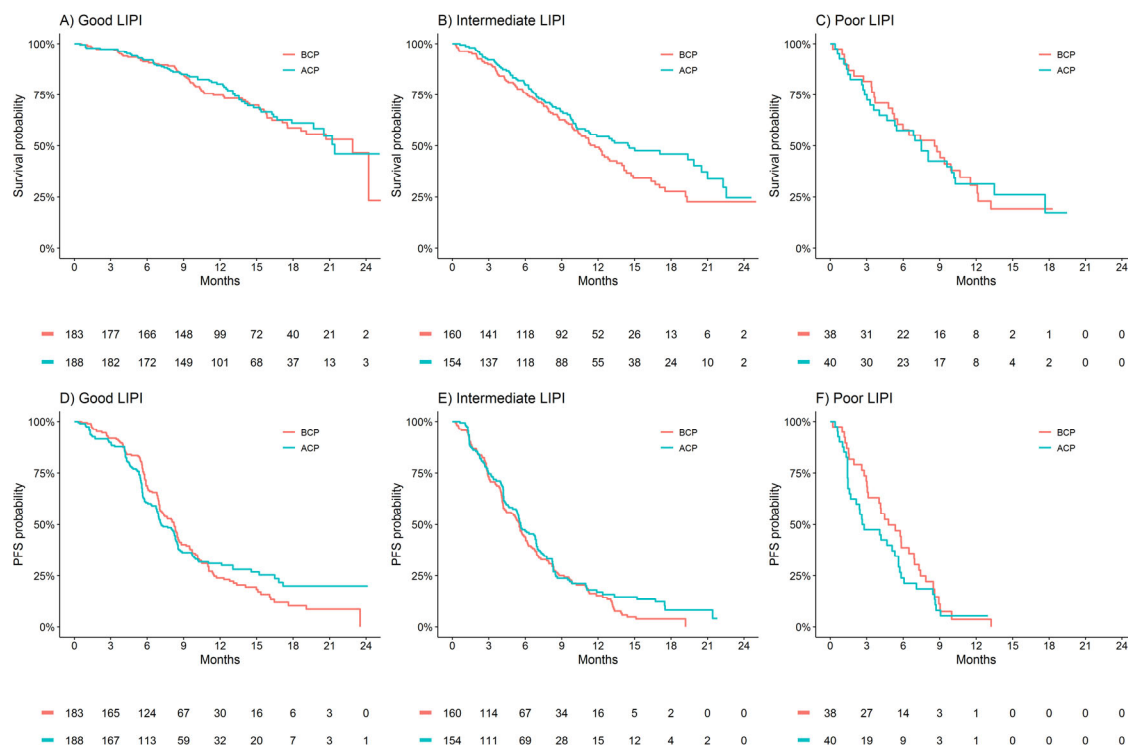

**Figure S1.** Kaplan Meier estimates of overall survival and progression-free survival in the randomized arms of IM-power150 (ACP versus BCP), subgrouped by LIPI.

**Table S1.** Summary of patient characteristics by study arm.

| Patient Characteristics | BCP<br>No. 400 | ACP<br>No. 402 | ABCP<br>No. 400 | <i>P</i> |
|-------------------------|----------------|----------------|-----------------|----------|
| Evaluable pts           | 381            | 382            | 385             |          |
| Age (years)             | 63 (57–69)     | 63 (57–68)     | 63 (57–70)      | 0.54     |
| Sex                     |                |                |                 | 1        |
| Male                    | 239 (60%)      | 241 (60%)      | 240 (60%)       |          |
| Female                  | 161 (40%)      | 161 (40%)      | 160 (40%)       |          |
| ECOG PS                 |                |                |                 | 0.28     |
| 0                       | 179 (45%)      | 180 (45%)      | 159 (40%)       |          |
| 1                       | 218 (55%)      | 222 (55%)      | 238 (60%)       |          |
| Missing                 | 3 (1%)         | 0 (0%)         | 3 (1%)          |          |
| Race                    |                |                |                 | 0.77     |
| White                   | 335 (84%)      | 331 (82%)      | 322 (80%)       |          |

|                                        |               |               |               |       |
|----------------------------------------|---------------|---------------|---------------|-------|
| Asian                                  | 46 (12%)      | 48 (12%)      | 56 (14%)      |       |
| Other/Missing                          | 19 (5%)       | 23 (6%)       | 22 (6%)       |       |
| Smoking history                        |               |               |               | 0.96  |
| Never                                  | 77 (19%)      | 77 (19%)      | 82 (20%)      |       |
| Previous                               | 231 (58%)     | 227 (56%)     | 228 (57%)     |       |
| Current                                | 92 (23%)      | 98 (24%)      | 90 (22%)      |       |
| Liver metastases                       | 57 (14%)      | 53 (13%)      | 53 (13%)      | 0.89  |
| Non-squamous histologic subtype        |               |               |               | 0.81  |
| Adenocarcinoma                         | 377 (94%)     | 383 (95%)     | 378 (94%)     |       |
| Other                                  | 17 (4%)       | 15 (4%)       | 19 (5%)       |       |
| Unknown or not assessed                | 6 (2%)        | 4 (1%)        | 3 (1%)        |       |
| PD-L1 expression #                     |               |               |               | 1     |
| TC0/1/2 and IC0/1                      | 301 (75%)     | 304 (76%)     | 299 (75%)     |       |
| TC0/1/2 and IC2/3                      | 50 (12%)      | 51 (13%)      | 53 (13%)      |       |
| TC3 and any IC                         | 49 (12%)      | 47 (12%)      | 48 (12%)      |       |
| Teff $\geq -1.91$ *                    |               |               |               | 0.17  |
| Yes                                    | 148 (37%)     | 177 (44%)     | 166 (42%)     |       |
| No                                     | 231 (58%)     | 210 (52%)     | 217 (54%)     |       |
| Missing                                | 21 (5%)       | 15 (4%)       | 17 (4%)       |       |
| EGFR mutation status                   |               |               |               | 0.41  |
| Negative                               | 345 (86%)     | 347 (86%)     | 352 (88%)     |       |
| Positive                               | 45 (11%)      | 46 (11%)      | 35 (9%)       |       |
| Missing                                | 10 (2%)       | 9 (2%)        | 13 (3%)       |       |
| Derived neutrophil to lymphocyte ratio |               |               |               | 0.097 |
| Median (IQR)                           | 2.2 (1.6–2.9) | 2.1 (1.6–3.0) | 2.3 (1.7–3.0) |       |
| Missing                                | 10 (2.5%)     | 4 (1.0%)      | 8 (2.0%)      |       |
| Lactate Dehydrogenase (U/L)            |               |               |               | 0.7   |
| Median (IQR)                           | 234 (184–318) | 233 (185–346) | 227 (181–327) |       |
| Missing                                | 17 (4%)       | 19 (5%)       | 15 (4%)       |       |
| Lung Immune Prognostic Index           |               |               |               | 0.91  |
| Good LIPI                              | 183 (46%)     | 188 (47%)     | 177 (44%)     |       |
| Intermediate LIPI                      | 160 (40%)     | 154 (38%)     | 165 (41%)     |       |
| Poor LIPI                              | 38 (10%)      | 40 (10%)      | 43 (11%)      |       |
| Missing                                | 19 (5%)       | 20 (5%)       | 15 (4%)       |       |

Data are median (IQR) or number of patients (%). P values per Chi-Square test for categorical data and Kruskal-Wallis test for continuous data. # Assessed by immunohistochemical analysis. Tumour cell (TC) or tumour-infiltrating immune cell (IC) group levels (TC PDL-L1 expression on <1% [TC0] or  $\geq 1\%$  to <5% [TC1] or  $\geq 5\%$  to <50% [TC2] or  $\geq 50\%$  [TC3]; IC PDL-L1 expression on <1% [IC0] or  $\geq 1\%$  to <5% [IC1] or  $\geq 5\%$  to <10% [IC2] or  $\geq 10\%$  [IC3]). \* effector T-cell gene signature score (Teff; high  $\geq -1.91$  versus low  $< -1.91$ ) derived from the average mRNA expression of PD-L1, CXCL9 and IFN $\gamma$  relative to a reference gene).

**Table S2.** Summary of patient characteristics by LIPI group.

| Patient Characteristics | Good LIPI<br>No. 548 | Intermediate LIPI<br>No. 479 | Poor LIPI<br>No. 121 | P      |
|-------------------------|----------------------|------------------------------|----------------------|--------|
| Treatment arm           |                      |                              |                      | 0.91   |
| BCP                     | 183 (33%)            | 160 (33%)                    | 38 (31%)             |        |
| ACP                     | 188 (34%)            | 154 (32%)                    | 40 (33%)             |        |
| ABCP                    | 177 (32%)            | 165 (34%)                    | 43 (36%)             |        |
| Age (years)             | 63 (57–70)           | 63 (57–68)                   | 63 (58–69)           | 0.7    |
| Sex                     |                      |                              |                      | 0.65   |
| Male                    | 333 (61%)            | 288 (60%)                    | 68 (56%)             |        |
| Female                  | 215 (39%)            | 191 (40%)                    | 53 (44%)             |        |
| ECOG PS                 |                      |                              |                      | <0.001 |
| 0                       | 268 (49%)            | 191 (40%)                    | 40 (33%)             |        |
| 1                       | 275 (50%)            | 287 (60%)                    | 81 (67%)             |        |
| Missing                 | 5 (1%)               | 1 (<1%)                      | 0 (0%)               |        |

|                                        |               |               |               |        |
|----------------------------------------|---------------|---------------|---------------|--------|
| Race                                   |               |               |               | 0.67   |
| White                                  | 448 (82%)     | 400 (84%)     | 95 (79%)      |        |
| Asian                                  | 72 (13%)      | 57 (12%)      | 17 (14%)      |        |
| Other/Missing                          | 28 (5%)       | 22 (5%)       | 9 (7%)        |        |
| Smoking history                        |               |               |               | 0.78   |
| Never                                  | 116 (21%)     | 91 (19%)      | 22 (18%)      |        |
| Previous                               | 310 (57%)     | 271 (57%)     | 73 (60%)      |        |
| Current                                | 122 (22%)     | 117 (24%)     | 26 (21%)      |        |
| Liver metastases                       | 48 (9%)       | 81 (17%)      | 24 (20%)      | <0.001 |
| Non-squamous histologic subtype        |               |               |               | 0.26   |
| Adenocarcinoma                         | 525 (96%)     | 450 (94%)     | 113 (93%)     |        |
| Other                                  | 19 (3%)       | 25 (5%)       | 5 (4%)        |        |
| Unknown or not assessed                | 4 (1%)        | 4 (1%)        | 3 (2%)        |        |
| PD-L1 expression #                     |               |               |               | 0.56   |
| TC0/1/2 and IC0/1                      | 401 (73%)     | 367 (77%)     | 94 (78%)      |        |
| TC0/1/2 and IC2/3                      | 79 (14%)      | 56 (12%)      | 12 (10%)      |        |
| TC3 and any IC                         | 68 (12%)      | 56 (12%)      | 15 (12%)      |        |
| Teff $\geq -1.91$ *                    |               |               |               | 0.97   |
| Yes                                    | 225 (41%)     | 198 (41%)     | 49 (40%)      |        |
| No                                     | 297 (54%)     | 263 (55%)     | 68 (56%)      |        |
| Missing                                | 26 (5%)       | 18 (4%)       | 4 (3%)        |        |
| EGFR mutation status                   |               |               |               | 0.36   |
| Negative                               | 472 (86%)     | 421 (88%)     | 106 (88%)     |        |
| Positive                               | 65 (12%)      | 44 (9%)       | 11 (9%)       |        |
| Missing                                | 11 (2%)       | 14 (3%)       | 4 (3%)        |        |
| Derived neutrophil to lymphocyte ratio | 1.9 (1.5–2.3) | 2.5 (1.8–3.3) | 4.0 (3.4–5.7) | <0.001 |
| Lactate Dehydrogenase (U/L)            | 193 (166–227) | 280 (212–412) | 306 (260–445) | <0.001 |

Data are median (IQR) or number of patients (%). P values per Chi-Square test for categorical data and Kruskal-Wallis test for continuous data. # Assessed by immunohistochemical analysis. Tumour cell (TC) or tumour-infiltrating immune cell (IC) group levels (TC PDL-L1 expression on <1% [TC0] or  $\geq 1\%$  to <5% [TC1] or  $\geq 5\%$  to <50% [TC2] or  $\geq 50\%$  [TC3]; IC PDL-L1 expression on <1% [IC0] or  $\geq 1\%$  to <5% [IC1] or  $\geq 5\%$  to <10% [IC2] or  $\geq 10\%$  [IC3]). \* effector T-cell gene signature score (Teff; high [ $\geq -1.91$ ] versus low [ $< -1.91$ ] derived from the average mRNA expression of PD-L1, CXCL9 and IFN $\gamma$  relative to a reference gene).

**Table 3.** Association (adjusted) between LIPI and survival outcomes for patients randomized with ABCP or ACP.

| Treatment Arm/Risk Group            | OS               |        | PFS              |        |
|-------------------------------------|------------------|--------|------------------|--------|
|                                     | HR [95% CI]      | P      | HR [95% CI]      | P      |
| ABCP                                |                  | <0.001 |                  | <0.001 |
| Good LIPI ( <i>n</i> = 163)         | 1.00             |        | 1.00             |        |
| Intermediate LIPI ( <i>n</i> = 153) | 2.12 [1.40–3.19] |        | 1.34 [0.99–1.81] |        |
| Poor LIPI ( <i>n</i> = 40)          | 7.11 [4.05–12.5] |        | 3.28 [2.11–5.11] |        |
| ACP                                 |                  | <0.001 |                  | <0.001 |
| Good LIPI ( <i>n</i> = 172)         | 1.00             |        | 1.00             |        |
| Intermediate LIPI ( <i>n</i> = 149) | 1.71 [1.18–2.48] |        | 1.51 [1.16–1.97] |        |
| Poor LIPI ( <i>n</i> = 39)          | 4.81 [2.90–7.97] |        | 2.91 [1.95–4.35] |        |

CI = confidence interval, HR = hazard ratio, PFS = progression free survival, OS = overall survival; Analyses stratified by sex, PD-L1 expression, and presence of liver metastases; Regression adjusted for age, ECOG PS, race, smoking status, histology, Teff, and EGFR mutation status.
